# Supplementary material
Source: HighWire-hosted journal article supplement (http://cmajopen.ca/highwire/filestream/87350/field_highwire_adjunct_files/1/2020-0231-2-at.pdf)

Appendix 2a: An example of the EOSS Dashboard - overview including patient EOSS and BMI cores, age of patients, distance from clinic, time since the last visit, patient comorbidities and medications for the physician's entire patient panel

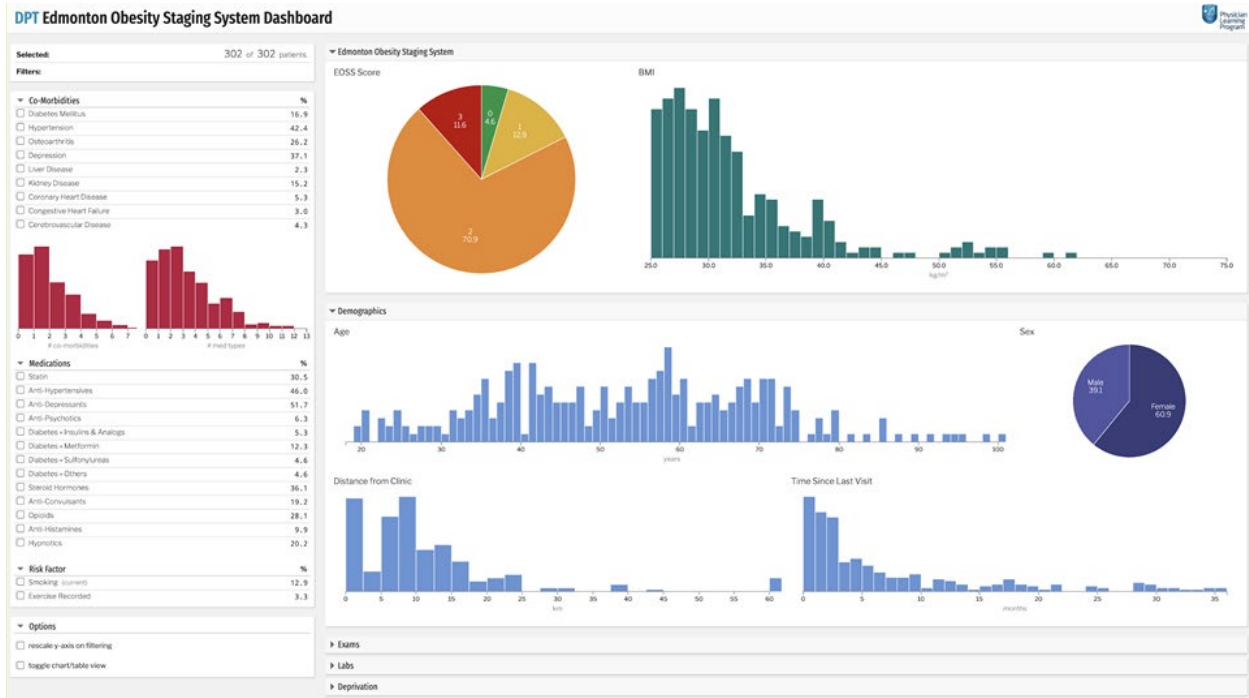

Appendix to: Swaleh R, McGuckin T, Myroniuk TW, et al. Using the Edmonton Obesity Staging System in the real world: a feasibility study based on cross-sectional data. *CMAJ Open* 2021. doi:10.9778/cmajo.2020-0231. Copyright © 2021 The Author(s) or their employer(s). To receive this resource in an accessible format, please contact us at [cmajgroup@cmaj.ca](mailto:cmajgroup@cmaj.ca)

Appendix 2b: An example of the EOSS Dashboard filtered for patients in EOSS 3

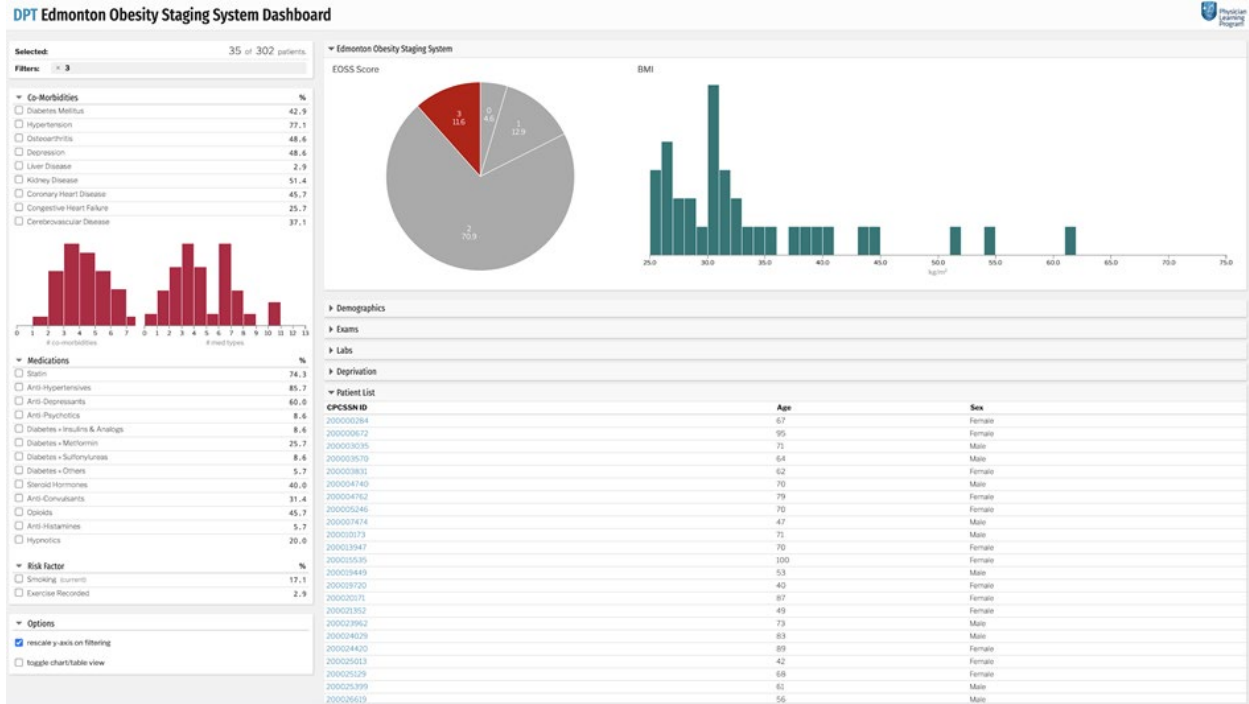

Appendix 2c: An example of the EOSS Dashboard – distribution of lab results for patients in the physician’s panel

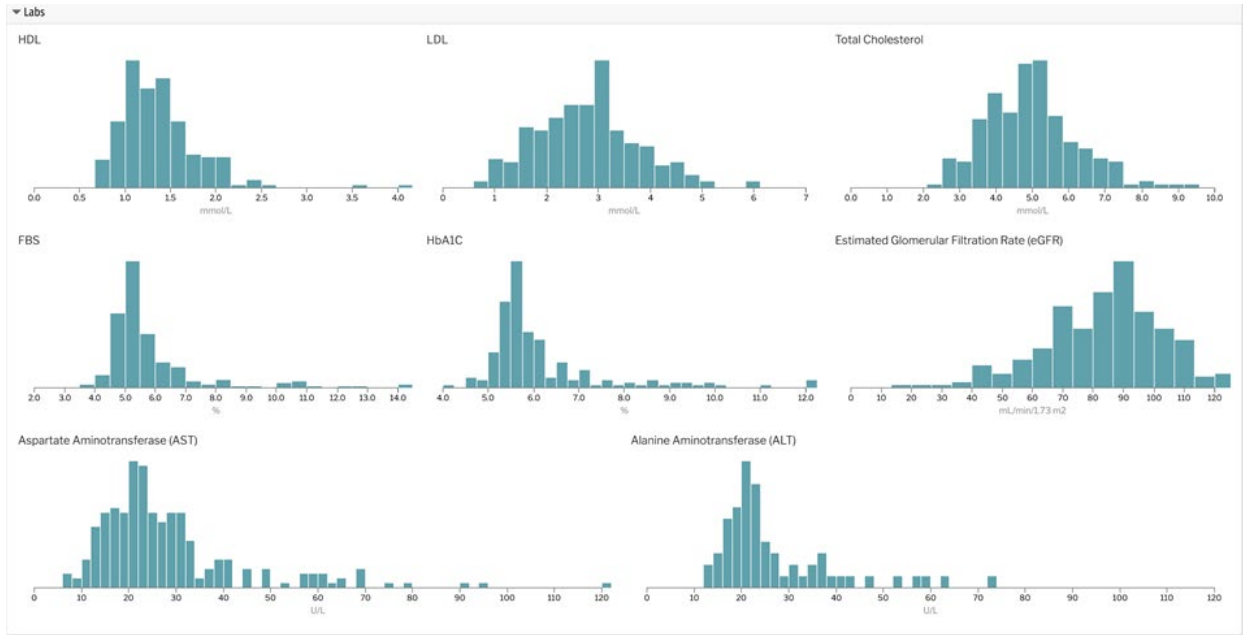

Appendix 2d: An example of the EOSS Dashboard – distribution of weights, heights, and blood pressures for patients in the physician’s panel

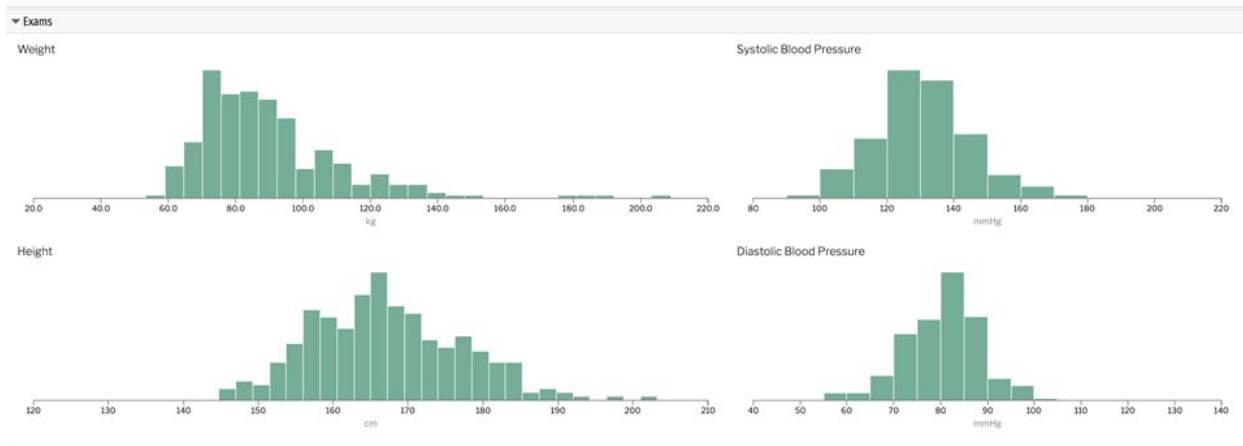

Supplement: 2020-0231-2-at.pdf [file 2020-0231-2-at.pdf]
